# Supplementary material for: Limitations in the Grain Boundary Processing of the Recycled HDDR Nd-Fe-B System
Source: MDPI journal article supplement (doi:10.3390/ma13163528), 2020-08-10
Supplement: s1 [file s1]

# Limitations in the Grain Boundary Processing of the Recycled HDDR Nd-Fe-B System

Awais Ikram <sup>1,2,3,\*</sup>, Muhammad Awais <sup>4</sup>, Richard Sheridan <sup>4</sup>, Allan Walton <sup>4</sup>, Spomenka Kobe <sup>2,3</sup>, Franci Pušavec <sup>1</sup> and Kristina Žužek Rožman <sup>2,3</sup>

<sup>1</sup> Faculty of Mechanical Engineering, University of Ljubljana, Aškerčeva cesta 6, SI-1000 Ljubljana, Slovenia; franci.pusavec@fs.uni-lj.si

<sup>2</sup> Department for Nanostructured Materials, Jožef Stefan Institute, Jamova 39, SI-1000 Ljubljana, Slovenia; spomenka.kobe@ijs.si (S.K.); tina.zuzek@ijs.si (Z.R.)

<sup>3</sup> Jožef Stefan International Postgraduate School, Jamova 39, SI-1000 Ljubljana, Slovenia

<sup>4</sup> School of Metallurgy and Materials, University of Birmingham, Edgbaston, Birmingham B15 2TT, UK; m.awais@bham.ac.uk (M.A.); r.s.sheridan.1@bham.ac.uk (R.S.); a.walton@bham.ac.uk (A.W.)

\* Correspondence: rana.awaisikram@yahoo.com

Received: 26 June 2020; Accepted: 5 August 2020; Published: date

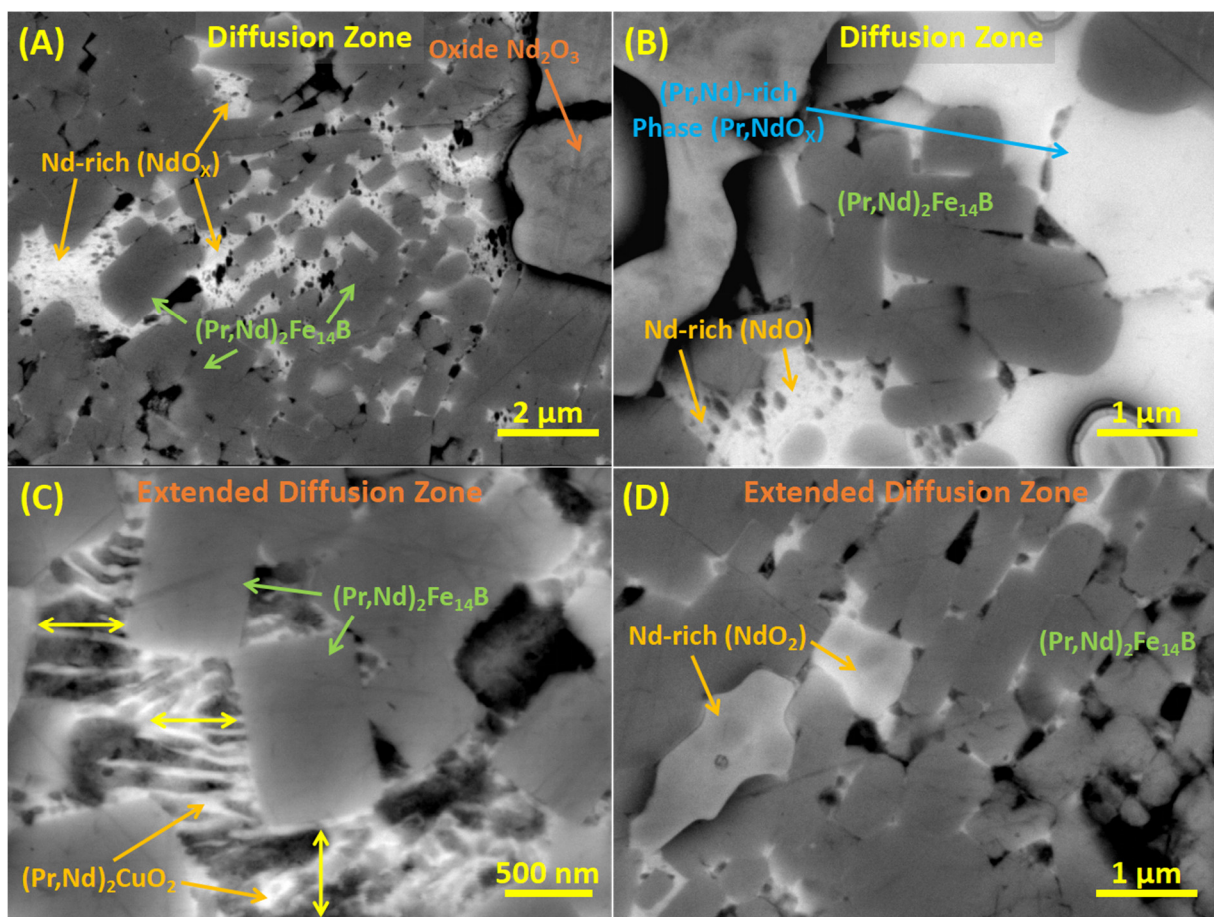

**Figure S1.** Supplementary backscattered electron microscopy images of (A) diffusion zone at 10000 X magnification showing the particle boundary on the right side and Nd-rich pool (lamellar morphology of NdO<sub>x</sub> composition) and in the vicinity (Pr,Nd)<sub>2</sub>Fe<sub>14</sub>B phases, (B) alternate higher magnification (20 kX) image of the diffusion zone with solidified liquid phase (Pr,Nd)O<sub>x</sub> diffused with the addition of 2 wt. % Pr-Cu alloy and the presence of Pr-containing matrix phase and lamellar

NdO<sub>x</sub> phase (bright contrast), (C) high magnification (30000 X) image of diffusion zone extended beyond ~250 µm and indicating presence of complex cuprates in the thick intergranular phase, and (D) 20 kX magnification of the extended zone with non-uniform distribution of liquid phase along the hard matrix phase.

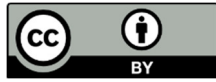

© 2020 by the authors. Submitted for possible open access publication under the terms and conditions of the Creative Commons Attribution (CC BY) license (<http://creativecommons.org/licenses/by/4.0/>).
